# Supplementary material
Source: PubMed Central journal article supplement (PMC4016706)
Supplement: supp_btu046_pnsc-supp.pdf [file supp_btu046_pnsc-supp.pdf]

# Supplementary Data

## Combinatorial Therapy Discovery using Mixed Integer Linear Programming

Kaifang Pang      Ying-Wooi Wan      William T. Choi      Lawrence A. Donehower  
Jingchun Sun      Dhruv Pant      Zhandong Liu

### Supplementary Text 1: Processing Drug Interaction and Action Data

We extracted 10,906 unique pairs of adverse drug-drug interaction and all the drug-action direction information from the DrugBank database. There are 37 unique types of drug actions and we manually divided these actions into three categories: positive, negative and unknown. For examples, if a drug is an activator or agonist to a target, we indicated the action of the drug on the target is positive; if a drug is an inhibitor or antagonist to a target, we indicated the action of the drug on the target is negative; if a drug is a binder or have unknown action to a target, we indicated the action of the drug on the target is unknown.

Given an input set of disease genes and required actions, we extracted the associated drugs from the drug-target network. Some drugs could target some input disease genes with right actions, but also could target some other input disease genes with opposite actions. We proposed two solutions to handle drugs with opposite actions on the input genes. The first solution is to remove all the drugs with opposite actions on the input disease genes before search for drug combination. The second solution is to keep all the drugs in the search, but consider input disease genes with opposite drug actions as special off-targets if these genes are covered by the selected drugs with opposite actions. For example, if the user wants to find drug combination to inhibit several oncogenes. The first solution will remove all the drugs that activate these oncogenes before search for drug combination. The second solution will consider these oncogenes as special off-targets if they are activated by the selected drugs. Our online tool allows the user to choose the solutions and to add a different weight to distinguish such special off-targets from the general off-targets. In addition, drugs with the same set of targets, actions, and interacting drugs were merged into a single meta-drug since they are equivalent to our algorithm.

### Supplementary Text 2: Mathematical Programming Formulation of MOTSC

Mathematically, MOTSC can be formulated using the Mixed Integer Linear Programming (MILP) as follows:

$$\begin{aligned} & \text{minimize} && \sum_{i=1}^q y_i && (1) \\ & \text{subject to} && (\mathbf{B}\mathbf{x})_j \geq 1 && \text{if } j = 1 : p && (2) \\ & && (\mathbf{B}\mathbf{x})_j - y'_i = 0 && \text{if } j = (p+1) : (p+q) && (3) \\ & && ky_i - y'_i \geq 0 && && (4) \\ & && y_i - y'_i \leq 0 && && (5) \\ & && y'_i \in \mathbb{Z}^+, y_i, x_j \in \{0, 1\} && && (6) \end{aligned}$$

The formulation has three variables,  $\mathbf{x}$ ,  $\mathbf{y}$ , and  $\mathbf{y}'$ . The first two are binary, and the last one is nonnegative. The binary solution vector  $\mathbf{x}$  indicates which drugs are selected. The non-negative cost variable  $y'_i$  counts the times that the  $i_{th}$  off-target gene is covered by the selected drugs. The binary cost vector  $\mathbf{y}$  is derived

from  $\mathbf{y}'$ ,  $y_i = 1$  if  $y'_i \geq 1$ ; otherwise,  $y_i = 0$ . The value of  $y_i$  indicates whether the  $i_{th}$  off-target gene is covered.

The relation between a given disease  $D$  and the associated drugs  $\mathcal{M}$  can be represented using a binary matrix  $\mathbf{B}$ . The rows are indexed by the on-targets ( $p$ ) and off-targets ( $q$ ), and the columns represent the drugs.  $\mathbf{B}_{jm} = 1$  if the  $j_{th}$  gene in  $D$  is covered by the  $m_{th}$  drug in  $\mathcal{M}$ ; otherwise,  $\mathbf{B}_{jm} = 0$ . The non-zero elements in the product vector of  $\mathbf{B}$  and  $\mathbf{x}$  indicate the corresponding genes targeted by a selection of drugs.

The intuition of the MILP formulation is the following. The inequality constraint (2) guarantees that any viable solution must cover all the on-target genes. The equality constraint (3) counts the times that an off-target is covered by the selected drug combination. However,  $\mathbf{y}'$  cannot be directly used in the objective cost function (1). Thus, the binary cost  $\mathbf{y}$  is introduced and related to  $\mathbf{y}'$  by the inequality constraints (4) and (5). The inequality constraint (4) requires  $y_i = 1$  if  $y'_i \geq 1$ . For that, the value of  $k$  needs to be at least the maximum value of all  $y'_i$ . The inequality constraint (5) guarantees that  $y_i = 0$  whenever  $y'_i = 0$ . In this paper, we solved MOTSC problem using the GNU MILP solver GLPK which is based on a branch and cut algorithm.

### Supplementary Text 3: Dual Problem of BTSC

PROBLEM 1. (Balanced Target Set Cover Problem, BTSC). Given a disease  $D = (T, S)$  and a collection of drugs  $\mathcal{M}$ , find a subset  $\mathcal{C} \subseteq \mathcal{M}$  and  $|\mathcal{C}| \leq k$  that minimize the  $cost(D, \mathcal{C}) = \alpha|T \setminus (\cup \mathcal{C})| + (1 - \alpha)|S \cap (\cup \mathcal{C})|$ , where  $\cup \mathcal{C} = \cup_{C \in \mathcal{C}} C$ ,  $k$  is the upper bound on the cardinality of the solution set  $\mathcal{C}$ , and  $\alpha$  is the weight balance of the coverage between on-target set  $T$  and off-target set  $S$ .

The ILP formulation of BTSC can be formulated as:

$$\text{minimize } \alpha \sum_{i=1}^p (1 - y_i) + (1 - \alpha) \sum_{i=p+1}^{p+q} y_i \quad (7)$$

$$\text{subject to } (\mathbf{B}\mathbf{x})_i - y'_i = 0 \quad (8)$$

$$by_i - y'_i \geq 0 \quad (9)$$

$$y_i - y'_i \leq 0 \quad (10)$$

$$\sum_{j=1}^m x_j \leq k \quad (11)$$

$$(\mathbf{L}\mathbf{x}) \preceq \mathbf{1} \quad (12)$$

$$y'_i \in \mathbb{Z}^+, y_i, x_j \in \{0, 1\}. \quad (13)$$

Constraints (9) and (10) are upper and lower bounds for  $y'$ . Constraint (12) is used to avoid drug-drug interaction effects. Without loss of generality, constraints (9), (10) and (12) can be dropped for the analysis of the dual problem. The LP relaxation can be formulated as follows:

$$\text{minimize } \alpha \sum_{i=1}^p (1 - y'_i) + (1 - \alpha) \sum_{i=p+1}^{p+q} y'_i \quad (14)$$

$$\text{subject to } (\mathbf{B}\mathbf{x})_i - y'_i = 0 \quad (15)$$

$$\sum_{j=1}^m x_j \leq k \quad (16)$$

$$y'_i \geq 0, 1 \geq x_j \geq 0. \quad (17)$$

The Lagrangian is

$$L(\mathbf{x}, \lambda_1, \lambda_2, \lambda_3) = \mathbf{w}^\top \mathbf{B}\mathbf{x} + \lambda_1(\mathbf{1}^\top \mathbf{x} - k) - \lambda_2^\top \mathbf{x} + \lambda_3^\top (\mathbf{x} - \mathbf{1}), \quad (18)$$

where  $\mathbf{w} = (\underbrace{-\alpha \dots -\alpha}_p, \underbrace{1 - \alpha \dots 1 - \alpha}_q)^\top$  is a weight vector.

Therefore, the dual function is

$$g(\lambda_1, \lambda_2, \lambda_3) = \inf_x L(\mathbf{x}, \lambda_1, \lambda_2, \lambda_3) = -\lambda_1 k - \mathbf{1}^\top \lambda_3 + \inf_x (\mathbf{B}^\top \mathbf{w} + \lambda_1 \mathbf{1} - \lambda_2 + \lambda_3)^\top \mathbf{x}. \quad (19)$$

The infimum of a linear function is  $-\infty$ , except in the special case when it is identically zero, so the dual function is

$$g(\lambda_1, \lambda_2) = \begin{cases} -\lambda_1 k - \mathbf{1}^\top \lambda_3 & \mathbf{B}^\top \mathbf{w} \succcurlyeq -(\lambda_1 + \lambda_3) \\ 0 & \text{otherwise} \end{cases}$$

The Lagrange dual of the LP relaxation is to maximize  $g$  over all  $\lambda_1 > 0$  and  $\lambda_3 \succcurlyeq 0$ . Again, we can reformulate this explicitly as:

$$\text{maximize} \quad -\lambda_1 k - \mathbf{1}^\top \lambda_3 \tag{20}$$

$$\text{subject to} \quad \mathbf{B}^\top \mathbf{w} \succcurlyeq -(\lambda_1 + \lambda_3) \tag{21}$$

$$\lambda_1 \geq 0, \lambda_3 \succcurlyeq 0 \tag{22}$$

## Supplementary Text 4: Dual Problem of MOTSC

Similarly, the Lagrange dual problem of the LP relaxation formulation on MOTSC can be deduced as follows:  
The Lagrangian is

$$\begin{aligned} L(\mathbf{x}, \mathbf{y}, \mathbf{v}_1, \mathbf{v}_2, \mathbf{v}_3, \mathbf{v}_4, \mathbf{v}_5) = & \mathbf{1}^\top \mathbf{y} + \mathbf{v}_1^\top (1 - \mathbf{B}_T \mathbf{x}) + \mathbf{v}_2^\top (\mathbf{B}_S \mathbf{x} - k \mathbf{y}) \\ & + \mathbf{v}_3^\top (\mathbf{y} - \mathbf{B}_S \mathbf{x}) - \mathbf{v}_4^\top \mathbf{x} - \mathbf{v}_5^\top \mathbf{y} \end{aligned} \tag{23}$$

where matrix  $\mathbf{B} = (\mathbf{B}_T; \mathbf{B}_S)$ ,  $\mathbf{B}_T$  is the incidence matrix for all the drugs on disease gene set  $T$ ,  $\mathbf{B}_S$  is the incidence matrix for all the drugs on off-target set  $S$ , and  $\mathbf{v}_1, \mathbf{v}_2, \mathbf{v}_3, \mathbf{v}_4, \mathbf{v}_5$  are the dual variables. The upper bound on  $\mathbf{x}$  and  $\mathbf{y}$  are dropped in the LP relaxation.

Therefore, the dual function is

$$\begin{aligned} g(\mathbf{v}_1, \mathbf{v}_2, \mathbf{v}_3, \mathbf{v}_4, \mathbf{v}_5) &= \inf_{\mathbf{x}, \mathbf{y}} L(\mathbf{x}, \mathbf{y}, \mathbf{v}_1, \mathbf{v}_2, \mathbf{v}_3, \mathbf{v}_4, \mathbf{v}_5) \\ &= \mathbf{1}^\top \mathbf{y} + \inf_{\mathbf{x}, \mathbf{y}} ((\mathbf{1} - k \mathbf{v}_2 + \mathbf{v}_3 - \mathbf{v}_5)^\top \mathbf{y} + (-\mathbf{B}_T^\top \mathbf{v}_1 + \mathbf{B}_S^\top \mathbf{v}_2 - \mathbf{B}_S^\top \mathbf{v}_3 - \mathbf{v}_4)^\top \mathbf{x}) \end{aligned} \tag{24}$$

The infimum of a linear function is  $-\infty$ , except in the special case when  $\mathbf{1} - k \mathbf{v}_2 + \mathbf{v}_3 \succeq 0$  and  $-\mathbf{B}_T^\top \mathbf{v}_1 + \mathbf{B}_S^\top \mathbf{v}_2 - \mathbf{B}_S^\top \mathbf{v}_3 \succeq 0$ . Hence, the Lagrange dual of the LP relaxation can be reformulated explicitly as:

$$\text{maximize} \quad \mathbf{1}^\top \mathbf{v}_1 \tag{25}$$

subject to

$$\mathbf{B}_T^\top \mathbf{v}_1 - \mathbf{B}_S^\top (\mathbf{v}_2 - \mathbf{v}_3) \preceq 0 \tag{26}$$

$$k \mathbf{v}_2 - \mathbf{v}_3 \preceq \mathbf{1} \tag{27}$$

$$\mathbf{v}_1, \mathbf{v}_2, \mathbf{v}_3 \succeq 0 \tag{28}$$

We can interpret the dual as maximizing the number of genes in set  $T$  such that the number of on-target genes packed in each drug does not exceed the number of off-target genes packed in the same drug. These conditions are guaranteed by inequalities (26) and (27). This problem can also be considered as a generalized Knapsack problem, where each drug is considered as a bag and we want to put maximum number of on-targets in each bag as long as it does not exceed the number of off-targets we put into the same bag.

## Supplementary Text 5: Search Parameters

The following are the parameters used by BTSC to predict drug combinations for the six disease gene sets.

### Acute Myocardial Infarction (AMI)

1. input genes: AHSP COL4A1 COL4A2 COL4A3 COL4A4 COL4A5 COL4A6 F10 F2 F2R F7 FGA FGB FGG PLAT PLG PROC PROS1 SERPINC1 TFPI
2. exclude adverse drug-drug interaction
3. remove drugs with opposite actions on input genes
4. balance weight  $\alpha$ : 0.5
5. number of selected drugs:  $\leq 4$
6. drug action selection step (based on available drug action and biological meaning; | indicates and):

| genes    | selected drug action | available drug action     |
|----------|----------------------|---------------------------|
| AHSP     |                      |                           |
| COL4A1   |                      |                           |
| COL4A2   |                      |                           |
| COL4A3   |                      |                           |
| COL4A4   |                      |                           |
| COL4A5   |                      |                           |
| COL4A6   |                      |                           |
| F10      | negative unknown     | positive negative unknown |
| F2       | negative unknown     | positive negative unknown |
| F2R      | unknown              | unknown                   |
| F7       | unknown              | positive unknown          |
| FGA      | negative unknown     | negative unknown          |
| FGB      | negative             | negative                  |
| FGG      | negative             | negative                  |
| PLAT     | unknown              | negative unknown          |
| PLG      | positive unknown     | positive negative unknown |
| PROC     | positive             | positive negative         |
| PROS1    | positive unknown     | positive negative unknown |
| SERPINC1 | positive unknown     | positive unknown          |
| TFPI     | negative unknown     | negative unknown          |

7. drug selection step: all the drugs

## EGFR-PI3K-AKT-mTOR (EPAM)

1. input genes: AKT1 AKT2 EGFR ERBB2 GSK3B MAPK1 MTOR PIK3CA PIK3CB PIK3CD PIK3CG PIK3R1 PIK3R2 PIK3R3 PLK1 PTEN TSC1 TSC2
2. exclude adverse drug-drug interaction
3. remove drugs with opposite actions on input genes
4. balance weight  $\alpha$ : 0.5
5. number of selected drugs:  $\leq 5$
6. drug action selection step (based on available drug action and biological meaning; | indicates and):

| genes  | selected drug action | available drug action     |
|--------|----------------------|---------------------------|
| AKT1   | unknown              | positive unknown          |
| AKT2   | unknown              | unknown                   |
| EGFR   | negative unknown     | negative unknown          |
| ERBB2  | negative             | negative                  |
| GSK3B  | negative unknown     | negative unknown          |
| MAPK1  | negative unknown     | positive negative unknown |
| MTOR   | negative             | positive negative         |
| PIK3CA | unknown              | unknown                   |
| PIK3CB |                      |                           |
| PIK3CD | unknown              | unknown                   |
| PIK3CG | unknown              | unknown                   |
| PIK3R1 | unknown              | positive unknown          |
| PIK3R2 |                      | positive                  |
| PIK3R3 |                      | positive                  |
| PLK1   | unknown              | unknown                   |
| PTEN   |                      |                           |
| TSC1   |                      |                           |
| TSC2   |                      |                           |

7. drug selection step: all the drugs

## Hypertension (HTN)

1. input genes: ACE ADRB1 ADRB2 ADRB3 AGT AGTR1 BDKRB2 CLCNKB CYP11B2 ECE1 ECE2 EDN1 EDNRA EDNRB HSD11B2 KCNJ11 KLK1 KNG1 NPPC NR3C2 REN SCNN1A SCNN1B SCNN1G SLC12A1 SLC12A3
2. exclude adverse drug-drug interaction
3. remove drugs with opposite actions on input genes
4. balance weight  $\alpha$ : 0.5
5. number of selected drugs:  $\leq 5$
6. drug action selection step (based on available drug action and biological meaning; | indicates and):

| genes   | selected drug action | available drug action     |
|---------|----------------------|---------------------------|
| ACE     | negative unknown     | negative unknown          |
| ADRB1   | negative unknown     | positive negative unknown |
| ADRB2   | negative unknown     | positive negative unknown |
| ADRB3   | negative unknown     | positive negative unknown |
| AGT     |                      |                           |
| AGTR1   | negative             | negative                  |
| BDKRB2  | negative             | negative                  |
| CLCNKB  |                      |                           |
| CYP11B2 |                      |                           |
| ECE1    | unknown              | unknown                   |
| ECE2    |                      |                           |
| EDN1    |                      |                           |
| EDNRA   | negative unknown     | negative unknown          |
| EDNRB   | negative             | negative                  |
| HSD11B2 | unknown              | unknown                   |
| KCNJ11  | negative unknown     | positive negative unknown |
| KLK1    | unknown              | unknown                   |
| KNG1    |                      |                           |
| NPPC    |                      |                           |
| NR3C2   | negative unknown     | positive negative unknown |
| REN     | negative unknown     | negative unknown          |
| SCNN1A  | negative             | negative                  |
| SCNN1B  | negative             | negative                  |
| SCNN1G  | negative             | negative                  |
| SLC12A1 | negative unknown     | positive negative unknown |
| SLC12A3 | negative unknown     | negative unknown          |

7. drug selection step: all the drugs

## Type 2 Diabetes Mellitus (T2DM)

- input genes: AKT2 CRK EIF4E EIF4EBP1 GRB2 HRAS INS INSR IRS1 IRS2 KRAS MAP2K1 MAP2K2 MAPK1 MAPK3 MTOR NRAS PDE3B PDPK1 PIK3CA PIK3CB PIK3R1 PIK3R2 PRKAA1 PRKAA2 PRKAB1 PRKAB2 PRKAG1 PRKAG2 PRKAG3 RAF1 RHEB RPS6 RPS6KB1 RPTOR SHC1 SHC2 SHC3 SOS1 TSC1 TSC2
- exclude adverse drug-drug interaction
- remove drugs with opposite actions on input genes
- balance weight  $\alpha$ : 0.5
- number of selected drugs:  $\leq 4$
- drug action selection step (based on available drug action and biological meaning; | indicates and):

| genes    | selected drug action | available drug action     |
|----------|----------------------|---------------------------|
| AKT2     | unknown              | unknown                   |
| CRK      |                      |                           |
| EIF4E    | unknown              | unknown                   |
| EIF4EBP1 |                      |                           |
| GRB2     | unknown              | unknown                   |
| HRAS     | unknown              | unknown                   |
| INS      | unknown              | unknown                   |
| INSR     | positive unknown     | positive unknown          |
| IRS1     | unknown              | unknown                   |
| IRS2     |                      |                           |
| KRAS     | unknown              | unknown                   |
| MAP2K1   | unknown              | unknown                   |
| MAP2K2   |                      |                           |
| MAPK1    | negative unknown     | positive negative unknown |
| MAPK3    | negative unknown     | positive negative unknown |
| MTOR     | negative             | positive negative         |
| NRAS     |                      |                           |
| PDE3B    | unknown              | unknown                   |
| PDPK1    | unknown              | negative unknown          |
| PIK3CA   | unknown              | unknown                   |
| PIK3CB   |                      |                           |
| PIK3R1   | positive unknown     | positive unknown          |
| PIK3R2   | positive             | positive                  |
| PRKAA1   | positive unknown     | positive unknown          |
| PRKAA2   |                      |                           |
| PRKAB1   | positive             | positive                  |
| PRKAB2   | positive             | positive                  |
| PRKAG1   |                      |                           |
| PRKAG2   |                      |                           |
| PRKAG3   |                      |                           |
| RAF1     | negative             | negative                  |
| RHEB     | unknown              | unknown                   |
| RPS6     |                      |                           |
| RPS6KB1  |                      |                           |
| RPTOR    |                      |                           |
| SHC1     |                      |                           |
| SHC2     |                      |                           |
| SHC3     |                      |                           |
| SOS1     |                      |                           |
| TSC1     |                      |                           |
| TSC2     |                      |                           |

- drug selection step: all the FDA-approved drugs

## Parkinson's Disease (PD)

1. input genes: COMT DDC DRD1 DRD2 DRD3 DRD4 DRD5 MAOA MAOB TH
2. exclude adverse drug-drug interaction
3. remove drugs with opposite actions on input genes
4. balance weight  $\alpha$ : 0.5
5. number of selected drugs:  $\leq 5$
6. drug action selection step (based on available drug action and biological meaning; | indicates and):

| genes | selected drug action | available drug action     |
|-------|----------------------|---------------------------|
| COMT  | negative unknown     | negative unknown          |
| DDC   | negative unknown     | negative unknown          |
| DRD1  | positive unknown     | positive negative unknown |
| DRD2  | positive unknown     | positive negative unknown |
| DRD3  | positive             | positive negative         |
| DRD4  | positive             | positive negative         |
| DRD5  | positive unknown     | positive negative unknown |
| MAOA  | negative unknown     | negative unknown          |
| MAOB  | negative unknown     | negative unknown          |
| TH    | unknown              | unknown                   |

7. drug selection step: all the FDA-approved drugs



## Schizophrenia (SZ)

- input genes: DRD1 DRD2 DRD3 DRD4 DRD5 GABBR1 GABRA1 GABRA6 GABRB2 GABRG2 GABRP GRIA1 GRIA4 GRID1 GRIK3 GRIK4 GRIN1 GRIN2B GRM3 GRM7 HTR1A HTR2A HTR3A HTR4 HTR5A SLC1A2 SLC6A3 SLC6A4
- exclude adverse drug-drug interaction
- remove drugs with opposite actions on input genes
- balance weight  $\alpha$ : 0.5
- number of selected drugs:  $\leq 5$
- drug action selection step (based on available drug action and biological meaning; | indicates and):

| genes  | selected drug action | available drug action     |
|--------|----------------------|---------------------------|
| DRD1   | negative unknown     | positive negative unknown |
| DRD2   | negative unknown     | positive negative unknown |
| DRD3   | negative             | positive negative         |
| DRD4   | negative             | positive negative         |
| DRD5   | negative unknown     | positive negative unknown |
| GABBR1 |                      | positive                  |
| GABRA1 | negative unknown     | positive negative unknown |
| GABRA6 |                      | positive                  |
| GABRB2 | negative             | positive negative         |
| GABRG2 | negative             | positive negative         |
| GABRP  |                      | positive                  |
| GRIA1  | negative unknown     | negative unknown          |
| GRIA4  | unknown              | unknown                   |
| GRID1  | unknown              | unknown                   |
| GRIK3  | unknown              | unknown                   |
| GRIK4  | unknown              | unknown                   |
| GRIN1  | negative unknown     | negative unknown          |
| GRIN2B | negative unknown     | negative unknown          |
| GRM3   | negative             | negative                  |
| GRM7   | unknown              | unknown                   |
| HTR1A  | negative unknown     | positive negative unknown |
| HTR2A  | negative unknown     | positive negative unknown |
| HTR3A  | negative unknown     | positive negative unknown |
| HTR4   | negative             | positive negative         |
| HTR5A  |                      |                           |
| SLC1A2 | unknown              | unknown                   |
| SLC6A3 | negative unknown     | positive negative unknown |
| SLC6A4 | negative unknown     | negative unknown          |

- drug selection step: all the FDA-approved drugs

We note that slightly varying the two parameters (balance weight  $\alpha$  and number of selected drugs) does not change the results much. The same parameters (removal of two constraints: balance weight  $\alpha$  and number of selected drugs) are used for MOTSC search. The following Supplementary Figures 5-9 are MOTSC search results.

## Supplementary Text 6: Performance on Predicting Drug Combinations in DCDB

To our knowledge, there is no gold standard data for the known associations between disease gene sets and drug combinations, so it is difficult to test the performance of our approach in a large scale. However, we tried our best to generate a benchmark dataset using drug combinations derived from DCDB. To do this, we first extracted 185 FDA-approved drug combinations and their targeting diseases from DCDB. We then removed the drug combinations if we cannot find their component drug and/or target information in the DrugBank database. We further removed the drug combinations if we cannot find a decent number of putative genes associated with their targeting diseases through search in Genotator (Wall *et al.*, 2010), OMIM (Hamosh *et al.*, 2005) and literature. The remaining data contains 68 approved drug combinations.

Next, for the 68 approved drug combinations, we extracted their targets from the DrugBank database and divided the targets into on-targets and off-targets as follows. For each approved drug combination, if a target have evidence to be involved in the targeting disease through search in Genotator, OMIM and literature, the target is denoted as an on-target; otherwise, the target is denoted as an off-target. These data were shown in the following table. For each approved drug combination with usage ID (column 1), the table shows its component drugs (column 2), on-targets (column 3) with drug actions (column 4; P=Positive, N=Negative, U=Unknown), and off-targets (column 5). The value in column 6 indicates the cost value associated with the approved drug combination if it is the optimal solution selected by our online tool through search using its on-targets and corresponding drug actions.

Finally, for the 68 approved drug combinations, we performed search using their on-targets and corresponding drug actions to see the extent to which they can be recovered by our online tool. For each predicted drug combination, the component drugs, genes covered, genes not covered, off-targets induced and associated cost value are shown in columns 7-11. If an approved drug combination has the same component drugs as the corresponding predicted drug combination, we indicated that the approved drug combination can be fully recovered (denote “yes” in column 12); if an approved drug combination shares at least two component drugs with the corresponding predicted drug combination, we indicated that the approved drug combination can be partly recovered (denote “partly yes” in column 12); if an approved drug combination shares at most one component drug with the corresponding predicted drug combination, we indicated that the approved drug combination cannot be recovered (denote “no” in column 12). Totally, 59 of 68 (accuracy = 86.8%) approved drug combinations can be fully or partly recovered, while 55 of 68 (accuracy = 80.9%) approved drug combinations can be fully recovered.

We note that although some approved drug combinations cannot be recovered, the corresponding predicted drug combinations are still FDA-approved or well-known drug combinations. For example, for the drug combination with usage ID “DCU0019”, the approved drug combination of DB00201 and DB00945 cannot be recovered, but the predicted drug combination of DB00201 and DB00316 is still an FDA-approved drug combination. We also note that the equivalent solutions exist during the optimal drug combination search. In other words, if two or more predicted drug combinations have the same cost value, these predicted drug combinations are equivalent. For each approved drug combination, if the equivalent solutions exist, only one solution close to the approved drug combination was shown in the following table. Currently, the equivalent solutions can be obtained via the iterative search function implemented in our online tool.

| Usage ID | Drugs   | On-Targets | Actions | Off-Targets | Cost | Predicted Drugs | Covered | Not Covered | Off-Targets | Cost | Coverage   |
|----------|---------|------------|---------|-------------|------|-----------------|---------|-------------|-------------|------|------------|
| DCU0007  | DB00201 | ADORA1     | N       | AKR1C1      | 2    | DB00201         | ADORA1  |             | PDE4B       | 1    | partly yes |
|          | DB00316 | ADORA2A    | N       | PDE4B       |      | DB00316         | ADORA2A |             |             |      |            |
|          | DB00945 | PTGS1      | N       |             |      | DB01628         | PTGS1   |             |             |      |            |
|          |         | PTGS2      | N       |             |      |                 | PTGS2   |             |             |      |            |
|          |         | RYR1       | U       |             |      | RYR1            |         |             |             |      |            |
| DCU0008  | DB00316 | OPRD1      | P       | AKR1C1      | 1    | DB00316         | OPRD1   |             |             | 0    | partly yes |
|          | DB00318 | OPRK1      | P       |             |      | DB00318         | OPRK1   |             |             |      |            |
|          | DB00945 | OPRM1      | P       |             |      | DB00580         | OPRM1   |             |             |      |            |
|          |         | PTGS1      | N       |             |      |                 | PTGS1   |             |             |      |            |
|          |         | PTGS2      | N       |             |      | PTGS2           |         |             |             |      |            |
| DCU0012  | DB00201 | ADORA1     | N       | PDE4B       | 1    | DB00201         | ADORA1  |             | PDE4B       | 1    | yes        |
|          | DB00316 | ADORA2A    | N       |             |      | DB00316         | ADORA2A |             |             |      |            |
|          |         | PTGS1      | N       |             |      |                 | PTGS1   |             |             |      |            |
|          |         | PTGS2      | N       |             |      |                 | PTGS2   |             |             |      |            |
|          |         | RYR1       | U       |             |      | RYR1            |         |             |             |      |            |
| DCU0013  | DB00316 | OPRD1      | P       |             | 0    | DB00316         | OPRD1   |             |             | 0    | yes        |
|          | DB00318 | OPRK1      | P       |             |      | DB00318         | OPRK1   |             |             |      |            |
|          |         | OPRM1      | P       |             |      |                 | OPRM1   |             |             |      |            |
|          |         | PTGS1      | N       |             |      |                 | PTGS1   |             |             |      |            |
|          |         | PTGS2      | N       |             |      | PTGS2           |         |             |             |      |            |
| DCU0015  | DB00316 | OPRD1      | P       |             | 0    | DB00316         | OPRD1   |             |             | 0    | yes        |

|         |                               |                                                                                                                                                                                                                                                                                                       |                                                                                                                                                         |   |                                          |                               |                                                                                                                                                                                                                                                                                                       |   |     |                                          |
|---------|-------------------------------|-------------------------------------------------------------------------------------------------------------------------------------------------------------------------------------------------------------------------------------------------------------------------------------------------------|---------------------------------------------------------------------------------------------------------------------------------------------------------|---|------------------------------------------|-------------------------------|-------------------------------------------------------------------------------------------------------------------------------------------------------------------------------------------------------------------------------------------------------------------------------------------------------|---|-----|------------------------------------------|
|         | DB00497                       | OPRK1<br>OPRM1<br>PTGS1<br>PTGS2                                                                                                                                                                                                                                                                      | P<br>P<br>N<br>N                                                                                                                                        |   |                                          | DB00497                       | OPRK1<br>OPRM1<br>PTGS1<br>PTGS2                                                                                                                                                                                                                                                                      |   |     |                                          |
| DCU0016 | DB00316<br>DB00652            | OPRK1<br>OPRM1<br>PTGS1<br>PTGS2<br>SIGMAR1                                                                                                                                                                                                                                                           | P<br>N<br>N<br>N<br>P                                                                                                                                   | 0 |                                          | DB00316<br>DB00652            | OPRK1<br>OPRM1<br>PTGS1<br>PTGS2<br>SIGMAR1                                                                                                                                                                                                                                                           | 0 | yes |                                          |
| DCU0017 | DB00316<br>DB00647            | OPRD1<br>OPRK1<br>OPRM1<br>PTGS1<br>PTGS2                                                                                                                                                                                                                                                             | P<br>N<br>P<br>N<br>N                                                                                                                                   | 0 |                                          | DB00316<br>DB00647            | OPRD1<br>OPRK1<br>OPRM1<br>PTGS1<br>PTGS2                                                                                                                                                                                                                                                             | 0 | yes |                                          |
| DCU0018 | DB00193<br>DB00316            | CHRM3<br>GRIN3A<br>HTR2C<br>OPRD1<br>OPRK1<br>OPRM1<br>PTGS1<br>PTGS2<br>SLC6A2<br>SLC6A4                                                                                                                                                                                                             | N<br>N<br>N<br>P<br>P<br>P<br>N<br>N<br>N<br>N                                                                                                          | 1 | CHRFAM7A                                 | DB00193<br>DB00316            | CHRM3<br>GRIN3A<br>HTR2C<br>OPRD1<br>OPRK1<br>OPRM1<br>PTGS1<br>PTGS2<br>SLC6A2<br>SLC6A4                                                                                                                                                                                                             | 1 | yes | CHRFAM7A                                 |
| DCU0019 | DB00201<br>DB00945            | ADORA1<br>ADORA2A<br>PTGS1<br>PTGS2<br>RYR1                                                                                                                                                                                                                                                           | N<br>N<br>N<br>N<br>U                                                                                                                                   | 2 | AKR1C1<br>PDE4B                          | DB00201<br>DB00316            | ADORA1<br>ADORA2A<br>PTGS1<br>PTGS2<br>RYR1                                                                                                                                                                                                                                                           | 1 | no  | PDE4B                                    |
| DCU0026 | DB00497<br>DB00945            | OPRD1<br>OPRK1<br>OPRM1<br>PTGS1<br>PTGS2                                                                                                                                                                                                                                                             | P<br>P<br>P<br>N<br>N                                                                                                                                   | 1 | AKR1C1                                   | DB00497<br>DB00465            | OPRD1<br>OPRK1<br>OPRM1<br>PTGS1<br>PTGS2                                                                                                                                                                                                                                                             | 0 | no  |                                          |
| DCU0027 | DB00669<br>DB00788            | HTR1A<br>HTR1B<br>HTR1D<br>HTR1F<br>PTGS1<br>PTGS2                                                                                                                                                                                                                                                    | P<br>P<br>P<br>P<br>N<br>N                                                                                                                              | 0 |                                          | DB00669<br>DB00788            | HTR1A<br>HTR1B<br>HTR1D<br>HTR1F<br>PTGS1<br>PTGS2                                                                                                                                                                                                                                                    | 0 | yes |                                          |
| DCU0030 | DB00201<br>DB00696            | ADORA1<br>ADORA2A<br>ADRA1A<br>ADRA2A<br>ADRA2B<br>DRD2<br>HTR1B<br>HTR1D<br>HTR2A<br>RYR1<br>SLC6A2                                                                                                                                                                                                  | N<br>N<br>P<br>P<br>P<br>P<br>P<br>P<br>P<br>U<br>N                                                                                                     | 3 | ADRA1B<br>ADRA1D<br>PDE4B                | DB00201<br>DB00696            | ADORA1<br>ADORA2A<br>ADRA1A<br>ADRA2A<br>ADRA2B<br>DRD2<br>HTR1B<br>HTR1D<br>HTR2A<br>RYR1<br>SLC6A2                                                                                                                                                                                                  | 3 | yes | ADRA1B<br>ADRA1D<br>PDE4B                |
| DCU0031 | DB00956<br>DB01050            | OPRD1<br>OPRM1<br>PTGS1<br>PTGS2                                                                                                                                                                                                                                                                      | P<br>P<br>U<br>N                                                                                                                                        | 0 |                                          | DB00956<br>DB01050            | OPRD1<br>OPRM1<br>PTGS1<br>PTGS2                                                                                                                                                                                                                                                                      | 0 | yes |                                          |
| DCU0032 | DB00652<br>DB01183            | ESR1<br>OPRD1<br>OPRK1<br>OPRM1<br>SIGMAR1                                                                                                                                                                                                                                                            | U<br>N<br>P<br>N<br>P                                                                                                                                   | 1 | CREB1                                    | DB00652<br>DB01183            | ESR1<br>OPRD1<br>OPRK1<br>OPRM1<br>SIGMAR1                                                                                                                                                                                                                                                            | 1 | yes | CREB1                                    |
| DCU0033 | DB00497<br>DB01050            | OPRD1<br>OPRK1<br>OPRM1<br>PTGS1<br>PTGS2                                                                                                                                                                                                                                                             | P<br>P<br>P<br>U<br>N                                                                                                                                   | 0 |                                          | DB00497<br>DB01050            | OPRD1<br>OPRK1<br>OPRM1<br>PTGS1<br>PTGS2                                                                                                                                                                                                                                                             | 0 | yes |                                          |
| DCU0036 | DB00316<br>DB00405<br>DB00852 | ADRA1A<br>ADRA2A<br>ADRB1<br>ADRB2<br>HRH1<br>PTGS1<br>PTGS2<br>SLC6A2<br>SLC6A3<br>SLC6A4                                                                                                                                                                                                            | P<br>P<br>P<br>P<br>N<br>N<br>N<br>N<br>N<br>N                                                                                                          | 0 |                                          | DB00316<br>DB00405<br>DB00852 | ADRA1A<br>ADRA2A<br>ADRB1<br>ADRB2<br>HRH1<br>PTGS1<br>PTGS2<br>SLC6A2<br>SLC6A3<br>SLC6A4                                                                                                                                                                                                            | 0 | yes |                                          |
| DCU0039 | DB00321<br>DB00475            | ADRA1A<br>ADRA1D<br>ADRA2A<br>CHRM1<br>CHRM2<br>CHRM3<br>CHRM4<br>CHRM5<br>GABRA1<br>GABRA2<br>GABRA3<br>GABRA4<br>GABRA5<br>GABRA6<br>GABRB1<br>GABRB2<br>GABRB3<br>GABRD<br>GABRE<br>GABRG1<br>GABRG2<br>GABRG3<br>GABRP<br>GABRQ<br>GABRR1<br>GABRR2<br>GABRR3<br>HTR1A<br>HTR2A<br>NTRK1<br>NTRK2 | N<br>N<br>N<br>N<br>N<br>N<br>N<br>N<br>P<br>P<br>P<br>P<br>P<br>P<br>P<br>P<br>P<br>P<br>P<br>P<br>P<br>P<br>P<br>P<br>P<br>P<br>P<br>U<br>N<br>P<br>P | 5 | HRH1<br>KCNA1<br>KCND2<br>KCND3<br>KCNQ2 | DB00321<br>DB00475            | ADRA1A<br>ADRA1D<br>ADRA2A<br>CHRM1<br>CHRM2<br>CHRM3<br>CHRM4<br>CHRM5<br>GABRA1<br>GABRA2<br>GABRA3<br>GABRA4<br>GABRA5<br>GABRA6<br>GABRB1<br>GABRB2<br>GABRB3<br>GABRD<br>GABRE<br>GABRG1<br>GABRG2<br>GABRG3<br>GABRP<br>GABRQ<br>GABRR1<br>GABRR2<br>GABRR3<br>HTR1A<br>HTR2A<br>NTRK1<br>NTRK2 | 5 | yes | HRH1<br>KCNA1<br>KCND2<br>KCND3<br>KCNQ2 |

|         |         |          |   |          |   |  |          |        |   |     |
|---------|---------|----------|---|----------|---|--|----------|--------|---|-----|
|         |         | OPRD1    | P |          |   |  | OPRD1    |        |   |     |
|         |         | OPRK1    | P |          |   |  | OPRK1    |        |   |     |
|         |         | SLC6A2   | N |          |   |  | SLC6A2   |        |   |     |
|         |         | SLC6A4   | N |          |   |  | SLC6A4   |        |   |     |
| DCU0040 | DB00321 | ADRA1A   | N | CALM1    | 6 |  | ADRA1A   | HRH1   | 5 | no  |
|         | DB00850 | ADRA1D   | N | HRH1     |   |  | ADRA1D   | KCNA1  |   |     |
|         |         | ADRA2A   | N | KCNA1    |   |  | ADRA2A   | KCND2  |   |     |
|         |         | CHRM1    | N | KCND2    |   |  | CHRM1    | KCND3  |   |     |
|         |         | CHRM2    | N | KCND3    |   |  | CHRM2    | KCNQ2  |   |     |
|         |         | CHRM3    | N | KCNQ2    |   |  | CHRM3    |        |   |     |
|         |         | CHRM4    | N |          |   |  | CHRM4    |        |   |     |
|         |         | CHRM5    | N |          |   |  | CHRM5    |        |   |     |
|         |         | DRD1     | N |          |   |  | DRD1     |        |   |     |
|         |         | DRD2     | N |          |   |  | DRD2     |        |   |     |
|         |         | HTR1A    | U |          |   |  | HTR1A    |        |   |     |
|         |         | HTR2A    | N |          |   |  | HTR2A    |        |   |     |
|         |         | NTRK1    | P |          |   |  | NTRK1    |        |   |     |
|         |         | NTRK2    | P |          |   |  | NTRK2    |        |   |     |
|         |         | OPRD1    | P |          |   |  | OPRD1    |        |   |     |
|         |         | OPRK1    | P |          |   |  | OPRK1    |        |   |     |
|         |         | SLC6A2   | N |          |   |  | SLC6A2   |        |   |     |
|         |         | SLC6A4   | N |          |   |  | SLC6A4   |        |   |     |
| DCU0057 | DB00373 | ADRA2A   | P |          | 0 |  | ADRA2A   |        | 0 | yes |
|         | DB00484 | ADRA2B   | P |          |   |  | ADRA2B   |        |   |     |
|         |         | ADRA2C   | P |          |   |  | ADRA2C   |        |   |     |
|         |         | ADRB1    | N |          |   |  | ADRB1    |        |   |     |
|         |         | ADRB2    | N |          |   |  | ADRB2    |        |   |     |
| DCU0059 | DB00983 | ADRB2    | P |          | 0 |  | ADRB2    |        | 0 | yes |
|         | DB01222 | NR3C1    | N |          |   |  | NR3C1    |        |   |     |
| DCU0061 | DB00190 | COMT     | N |          | 0 |  | COMT     |        | 0 | yes |
|         | DB00494 | DDC      | N |          |   |  | DDC      |        |   |     |
|         | DB01235 | DRD1     | P |          |   |  | DRD1     |        |   |     |
|         |         | DRD2     | P |          |   |  | DRD2     |        |   |     |
|         |         | DRD3     | P |          |   |  | DRD3     |        |   |     |
|         |         | DRD4     | P |          |   |  | DRD4     |        |   |     |
|         |         | DRD5     | P |          |   |  | DRD5     |        |   |     |
| DCU0062 | DB00190 | DDC      | N |          | 0 |  | DDC      |        | 0 | yes |
|         | DB01235 | DRD1     | P |          |   |  | DRD1     |        |   |     |
|         |         | DRD2     | P |          |   |  | DRD2     |        |   |     |
|         |         | DRD3     | P |          |   |  | DRD3     |        |   |     |
|         |         | DRD4     | P |          |   |  | DRD4     |        |   |     |
|         |         | DRD5     | P |          |   |  | DRD5     |        |   |     |
| DCU0080 | DB01050 | HRH1     | N |          | 0 |  | HRH1     |        | 0 | yes |
|         | DB01075 | PTGS1    | U |          |   |  | PTGS1    |        |   |     |
|         |         | PTGS2    | N |          |   |  | PTGS2    |        |   |     |
| DCU0096 | DB00334 | ADRA1A   | N | ADRA2B   | 2 |  | ADRA1A   | ADRA2B | 2 | yes |
|         | DB00472 | ADRA1B   | N | HRH1     |   |  | ADRA1B   | HRH1   |   |     |
|         |         | ADRA2A   | N |          |   |  | ADRA2A   |        |   |     |
|         |         | ADRA2C   | N |          |   |  | ADRA2C   |        |   |     |
|         |         | CHRM1    | N |          |   |  | CHRM1    |        |   |     |
|         |         | CHRM2    | N |          |   |  | CHRM2    |        |   |     |
|         |         | CHRM3    | N |          |   |  | CHRM3    |        |   |     |
|         |         | CHRM4    | N |          |   |  | CHRM4    |        |   |     |
|         |         | CHRM5    | N |          |   |  | CHRM5    |        |   |     |
|         |         | DRD1     | N |          |   |  | DRD1     |        |   |     |
|         |         | DRD2     | N |          |   |  | DRD2     |        |   |     |
|         |         | DRD3     | N |          |   |  | DRD3     |        |   |     |
|         |         | DRD4     | N |          |   |  | DRD4     |        |   |     |
|         |         | DRD5     | N |          |   |  | DRD5     |        |   |     |
|         |         | HTR1A    | N |          |   |  | HTR1A    |        |   |     |
|         |         | HTR1B    | N |          |   |  | HTR1B    |        |   |     |
|         |         | HTR1D    | N |          |   |  | HTR1D    |        |   |     |
|         |         | HTR1E    | N |          |   |  | HTR1E    |        |   |     |
|         |         | HTR2A    | N |          |   |  | HTR2A    |        |   |     |
|         |         | HTR2C    | N |          |   |  | HTR2C    |        |   |     |
|         |         | HTR3A    | N |          |   |  | HTR3A    |        |   |     |
|         |         | HTR6     | N |          |   |  | HTR6     |        |   |     |
|         |         | HTR7     | N |          |   |  | HTR7     |        |   |     |
|         |         | SLC6A4   | N |          |   |  | SLC6A4   |        |   |     |
| DCU0102 | DB00381 | AHR      | P | CACNA1B  | 3 |  | AHR      | CA1    | 1 | no  |
|         | DB01076 | CA1      | N | CACNA2D3 |   |  | CA1      |        |   |     |
|         |         | CACNA1C  | N | CACNB1   |   |  | CACNA1C  |        |   |     |
|         |         | CACNA1D  | N |          |   |  | CACNA1D  |        |   |     |
|         |         | CACNA1S  | N |          |   |  | CACNA1S  |        |   |     |
|         |         | CACNA2D1 | N |          |   |  | CACNA2D1 |        |   |     |
|         |         | CACNB2   | N |          |   |  | CACNB2   |        |   |     |
|         |         | DPP4     | N |          |   |  | DPP4     |        |   |     |
|         |         | HMGCR    | N |          |   |  | HMGCR    |        |   |     |
| DCU0103 | DB00492 | ACE      | N |          | 0 |  | ACE      |        | 0 | yes |
|         | DB00999 | CA1      | N |          |   |  | CA1      |        |   |     |
|         |         | CA12     | N |          |   |  | CA12     |        |   |     |
|         |         | CA2      | N |          |   |  | CA2      |        |   |     |
|         |         | CA4      | N |          |   |  | CA4      |        |   |     |
|         |         | CA9      | N |          |   |  | CA9      |        |   |     |
|         |         | KCNMA1   | U |          |   |  | KCNMA1   |        |   |     |
|         |         | SLC12A3  | N |          |   |  | SLC12A3  |        |   |     |
| DCU0104 | DB00542 | ACE      | N |          | 0 |  | ACE      |        | 0 | yes |
|         | DB00999 | CA1      | N |          |   |  | CA1      |        |   |     |
|         |         | CA12     | N |          |   |  | CA12     |        |   |     |
|         |         | CA2      | N |          |   |  | CA2      |        |   |     |
|         |         | CA4      | N |          |   |  | CA4      |        |   |     |
|         |         | CA9      | N |          |   |  | CA9      |        |   |     |
|         |         | KCNMA1   | U |          |   |  | KCNMA1   |        |   |     |
|         |         | SLC12A3  | N |          |   |  | SLC12A3  |        |   |     |
| DCU0105 | DB00999 | CA1      | N |          | 0 |  | CA1      |        | 0 | yes |
|         | DB01258 | CA12     | N |          |   |  | CA12     |        |   |     |
|         |         | CA2      | N |          |   |  | CA2      |        |   |     |
|         |         | CA4      | N |          |   |  | CA4      |        |   |     |
|         |         | CA9      | N |          |   |  | CA9      |        |   |     |
|         |         | KCNMA1   | U |          |   |  | KCNMA1   |        |   |     |
|         |         | REN      | N |          |   |  | REN      |        |   |     |
|         |         | SLC12A3  | N |          |   |  | SLC12A3  |        |   |     |
| DCU0106 | DB00594 | ACCN1    | N | ABP1     | 1 |  | ACCN1    | ABP1   | 1 | yes |
|         | DB00999 | ACCN2    | N |          |   |  | ACCN2    |        |   |     |
|         |         | CA1      | N |          |   |  | CA1      |        |   |     |
|         |         | CA12     | N |          |   |  | CA12     |        |   |     |

|         |                    |          |   |          |   |          |     |   |     |
|---------|--------------------|----------|---|----------|---|----------|-----|---|-----|
|         |                    | CA2      | N |          |   | CA2      |     |   |     |
|         |                    | CA4      | N |          |   | CA4      |     |   |     |
|         |                    | CA9      | N |          |   | CA9      |     |   |     |
|         |                    | KCNMA1   | U |          |   | KCNMA1   |     |   |     |
|         |                    | PLAU     | N |          |   | PLAU     |     |   |     |
|         |                    | SCNN1A   | N |          |   | SCNN1A   |     |   |     |
|         |                    | SCNN1B   | N |          |   | SCNN1B   |     |   |     |
|         |                    | SCNN1D   | N |          |   | SCNN1D   |     |   |     |
|         |                    | SCNN1G   | N |          |   | SCNN1G   |     |   |     |
|         |                    | SLC12A3  | N |          |   | SLC12A3  |     |   |     |
|         |                    | SLC9A1   | N |          |   | SLC9A1   |     |   |     |
| DCU0107 | DB00436<br>DB01203 | ADRB1    | N |          | 0 | ADRB1    |     | 0 | yes |
|         |                    | ADRB2    | N |          |   | ADRB2    |     |   |     |
|         |                    | CA1      | N |          |   | CA1      |     |   |     |
|         |                    | CA2      | N |          |   | CA2      |     |   |     |
|         |                    | CA4      | N |          |   | CA4      |     |   |     |
|         |                    | KCNMA1   | P |          |   | KCNMA1   |     |   |     |
|         |                    | SLC12A3  | N |          |   | SLC12A3  |     |   |     |
| DCU0108 | DB00381<br>DB00542 | ACE      | N | CACNA1B  | 3 | ACE      | CA1 | 1 | no  |
|         |                    | CA1      | N | CACNA2D3 |   | CACNA1C  |     |   |     |
|         |                    | CACNA1C  | N | CACNB1   |   | CACNA1D  |     |   |     |
|         |                    | CACNA1D  | N |          |   | CACNA1S  |     |   |     |
|         |                    | CACNA1S  | N |          |   | CACNA2D1 |     |   |     |
|         |                    | CACNA2D1 | N |          |   | CACNB2   |     |   |     |
|         |                    | CACNB2   | N |          |   |          |     |   |     |
| DCU0109 | DB00275<br>DB00381 | AGTR1    | N | CACNA1B  | 3 | AGTR1    | CA1 | 1 | no  |
|         |                    | CA1      | N | CACNA2D3 |   | CACNA1C  |     |   |     |
|         |                    | CACNA1C  | N | CACNB1   |   | CACNA1D  |     |   |     |
|         |                    | CACNA1D  | N |          |   | CACNA1S  |     |   |     |
|         |                    | CACNA1S  | N |          |   | CACNA2D1 |     |   |     |
|         |                    | CACNA2D1 | N |          |   | CACNB2   |     |   |     |
|         |                    | CACNB2   | N |          |   |          |     |   |     |
| DCU0110 | DB00177<br>DB00381 | AGTR1    | N | CACNA1B  | 3 | AGTR1    | CA1 | 1 | no  |
|         |                    | CA1      | N | CACNA2D3 |   | CACNA1C  |     |   |     |
|         |                    | CACNA1C  | N | CACNB1   |   | CACNA1D  |     |   |     |
|         |                    | CACNA1D  | N |          |   | CACNA1S  |     |   |     |
|         |                    | CACNA1S  | N |          |   | CACNA2D1 |     |   |     |
|         |                    | CACNA2D1 | N |          |   | CACNB2   |     |   |     |
|         |                    | CACNB2   | N |          |   |          |     |   |     |
| DCU0112 | DB00999<br>DB01029 | AGTR1    | N |          | 0 | AGTR1    |     | 0 | yes |
|         |                    | CA1      | N |          |   | CA1      |     |   |     |
|         |                    | CA12     | N |          |   | CA12     |     |   |     |
|         |                    | CA2      | N |          |   | CA2      |     |   |     |
|         |                    | CA4      | N |          |   | CA4      |     |   |     |
|         |                    | CA9      | N |          |   | CA9      |     |   |     |
|         |                    | JUN      | U |          |   | JUN      |     |   |     |
|         |                    | KCNMA1   | U |          |   | KCNMA1   |     |   |     |
|         |                    | SLC12A3  | N |          |   | SLC12A3  |     |   |     |
| DCU0113 | DB00722<br>DB00999 | ACE      | N |          | 0 | ACE      |     | 0 | yes |
|         |                    | ACE2     | N |          |   | ACE2     |     |   |     |
|         |                    | CA1      | N |          |   | CA1      |     |   |     |
|         |                    | CA12     | N |          |   | CA12     |     |   |     |
|         |                    | CA2      | N |          |   | CA2      |     |   |     |
|         |                    | CA4      | N |          |   | CA4      |     |   |     |
|         |                    | CA9      | N |          |   | CA9      |     |   |     |
|         |                    | KCNMA1   | U |          |   | KCNMA1   |     |   |     |
|         |                    | SLC12A3  | N |          |   | SLC12A3  |     |   |     |
| DCU0114 | DB00678<br>DB00999 | AGTR1    | N |          | 0 | AGTR1    |     | 0 | yes |
|         |                    | CA1      | N |          |   | CA1      |     |   |     |
|         |                    | CA12     | N |          |   | CA12     |     |   |     |
|         |                    | CA2      | N |          |   | CA2      |     |   |     |
|         |                    | CA4      | N |          |   | CA4      |     |   |     |
|         |                    | CA9      | N |          |   | CA9      |     |   |     |
|         |                    | KCNMA1   | U |          |   | KCNMA1   |     |   |     |
|         |                    | SLC12A3  | N |          |   | SLC12A3  |     |   |     |
| DCU0115 | DB00968<br>DB00999 | ADRA2A   | U |          | 0 | ADRA2A   |     | 0 | yes |
|         |                    | CA1      | N |          |   | CA1      |     |   |     |
|         |                    | CA12     | N |          |   | CA12     |     |   |     |
|         |                    | CA2      | N |          |   | CA2      |     |   |     |
|         |                    | CA4      | N |          |   | CA4      |     |   |     |
|         |                    | CA9      | N |          |   | CA9      |     |   |     |
|         |                    | KCNMA1   | U |          |   | KCNMA1   |     |   |     |
|         |                    | SLC12A3  | N |          |   | SLC12A3  |     |   |     |
| DCU0116 | DB00264<br>DB00999 | ADRB1    | N |          | 0 | ADRB1    |     | 0 | yes |
|         |                    | ADRB2    | N |          |   | ADRB2    |     |   |     |
|         |                    | CA1      | N |          |   | CA1      |     |   |     |
|         |                    | CA12     | N |          |   | CA12     |     |   |     |
|         |                    | CA2      | N |          |   | CA2      |     |   |     |
|         |                    | CA4      | N |          |   | CA4      |     |   |     |
|         |                    | CA9      | N |          |   | CA9      |     |   |     |
|         |                    | KCNMA1   | U |          |   | KCNMA1   |     |   |     |
|         |                    | SLC12A3  | N |          |   | SLC12A3  |     |   |     |
| DCU0117 | DB00275<br>DB00999 | AGTR1    | N |          | 0 | AGTR1    |     | 0 | yes |
|         |                    | CA1      | N |          |   | CA1      |     |   |     |
|         |                    | CA12     | N |          |   | CA12     |     |   |     |
|         |                    | CA2      | N |          |   | CA2      |     |   |     |
|         |                    | CA4      | N |          |   | CA4      |     |   |     |
|         |                    | CA9      | N |          |   | CA9      |     |   |     |
|         |                    | KCNMA1   | U |          |   | KCNMA1   |     |   |     |
|         |                    | SLC12A3  | N |          |   | SLC12A3  |     |   |     |
| DCU0118 | DB00571<br>DB00999 | ADRB1    | N |          | 0 | ADRB1    |     | 0 | yes |
|         |                    | ADRB2    | N |          |   | ADRB2    |     |   |     |
|         |                    | ADRB3    | N |          |   | ADRB3    |     |   |     |
|         |                    | CA1      | N |          |   | CA1      |     |   |     |
|         |                    | CA12     | N |          |   | CA12     |     |   |     |
|         |                    | CA2      | N |          |   | CA2      |     |   |     |
|         |                    | CA4      | N |          |   | CA4      |     |   |     |
|         |                    | CA9      | N |          |   | CA9      |     |   |     |
|         |                    | HTR1A    | U |          |   | HTR1A    |     |   |     |
|         |                    | HTR1B    | U |          |   | HTR1B    |     |   |     |
|         |                    | KCNMA1   | U |          |   | KCNMA1   |     |   |     |
|         |                    | SLC12A3  | N |          |   | SLC12A3  |     |   |     |
| DCU0119 | DB00881<br>DB00999 | ACE      | N |          | 0 | ACE      |     | 0 | yes |
|         |                    | CA1      | N |          |   | CA1      |     |   |     |
|         |                    | CA12     | N |          |   | CA12     |     |   |     |
|         |                    | CA2      | N |          |   | CA2      |     |   |     |

|         |         |          |   |          |   |         |          |         |          |     |    |
|---------|---------|----------|---|----------|---|---------|----------|---------|----------|-----|----|
|         |         | CA4      | N |          |   | CA4     |          |         |          |     |    |
|         |         | CA9      | N |          |   | CA9     |          |         |          |     |    |
|         |         | KCNMA1   | U |          |   | KCNMA1  |          |         |          |     |    |
|         |         | SLC12A3  | N |          |   | SLC12A3 |          |         |          |     |    |
| DCU0120 | DB00421 | AR       | N |          | 0 | DB00421 | AR       |         | 0        | yes |    |
|         | DB00999 | CA1      | N |          |   | DB00999 | CA1      |         |          |     |    |
|         |         | CA12     | N |          |   |         | CA12     |         |          |     |    |
|         |         | CA2      | N |          |   |         | CA2      |         |          |     |    |
|         |         | CA4      | N |          |   |         | CA4      |         |          |     |    |
|         |         | CA9      | N |          |   |         | CA9      |         |          |     |    |
|         |         | KCNMA1   | U |          |   |         | KCNMA1   |         |          |     |    |
|         |         | NR3C2    | N |          |   |         | NR3C2    |         |          |     |    |
|         |         | SLC12A3  | N |          |   |         | SLC12A3  |         |          |     |    |
| DCU0121 | DB00966 | AGTR1    | N |          | 0 | DB00966 | AGTR1    |         | 0        | yes |    |
|         | DB00999 | CA1      | N |          |   | DB00999 | CA1      |         |          |     |    |
|         |         | CA12     | N |          |   |         | CA12     |         |          |     |    |
|         |         | CA2      | N |          |   |         | CA2      |         |          |     |    |
|         |         | CA4      | N |          |   |         | CA4      |         |          |     |    |
|         |         | CA9      | N |          |   |         | CA9      |         |          |     |    |
|         |         | KCNMA1   | U |          |   |         | KCNMA1   |         |          |     |    |
|         |         | PPARG    | P |          |   |         | PPARG    |         |          |     |    |
|         |         | SLC12A3  | N |          |   |         | SLC12A3  |         |          |     |    |
| DCU0122 | DB00384 | CA1      | N |          | 0 | DB00384 | CA1      |         | 0        | yes |    |
|         | DB00999 | CA12     | N |          |   | DB00999 | CA12     |         |          |     |    |
|         |         | CA2      | N |          |   |         | CA2      |         |          |     |    |
|         |         | CA4      | N |          |   |         | CA4      |         |          |     |    |
|         |         | CA9      | N |          |   |         | CA9      |         |          |     |    |
|         |         | KCNMA1   | U |          |   |         | KCNMA1   |         |          |     |    |
|         |         | SCNN1A   | N |          |   |         | SCNN1A   |         |          |     |    |
|         |         | SCNN1B   | N |          |   |         | SCNN1B   |         |          |     |    |
|         |         | SCNN1D   | N |          |   |         | SCNN1D   |         |          |     |    |
|         |         | SCNN1G   | N |          |   |         | SCNN1G   |         |          |     |    |
|         |         | SLC12A3  | N |          |   |         | SLC12A3  |         |          |     |    |
| DCU0123 | DB00177 | AGTR1    | N |          | 0 | DB00177 | AGTR1    |         | 0        | yes |    |
|         | DB00999 | CA1      | N |          |   | DB00999 | CA1      |         |          |     |    |
|         |         | CA12     | N |          |   |         | CA12     |         |          |     |    |
|         |         | CA2      | N |          |   |         | CA2      |         |          |     |    |
|         |         | CA4      | N |          |   |         | CA4      |         |          |     |    |
|         |         | CA9      | N |          |   |         | CA9      |         |          |     |    |
|         |         | KCNMA1   | U |          |   |         | KCNMA1   |         |          |     |    |
|         |         | SLC12A3  | N |          |   |         | SLC12A3  |         |          |     |    |
| DCU0124 | DB00519 | ACE      | N | CACNA1B  | 7 | DB00519 | ACE      | CACNA1A | CACNA2D1 | 6   | no |
|         | DB00661 | CACNA1A  | N | CACNA1F  |   | DB00401 | CACNA1C  | CACNB3  |          |     |    |
|         |         | CACNA1C  | N | CACNA1G  |   |         | CACNA1D  | KCNH2   |          |     |    |
|         |         | CACNA1D  | N | CACNA1I  |   |         | CACNA1S  | KCNJ11  |          |     |    |
|         |         | CACNA1S  | N | CACNB1   |   |         | CACNB2   | SLC6A4  |          |     |    |
|         |         | CACNB2   | N | CACNB4   |   |         |          |         |          |     |    |
|         |         | CACNB3   | N | SCN5A    |   |         |          |         |          |     |    |
|         |         | KCNH2    | N |          |   |         |          |         |          |     |    |
|         |         | KCNJ11   | N |          |   |         |          |         |          |     |    |
|         |         | SLC6A4   | U |          |   |         |          |         |          |     |    |
| DCU0125 | DB00584 | ACE      | N | CACNA2D2 | 6 | DB00401 | CACNA1C  | ACE     |          | 2   | no |
|         | DB01023 | CACNA1C  | N | CALM1    |   | DB00700 | CACNA1D  | CACNA1H |          |     |    |
|         |         | CACNA1D  | N | PDE1A    |   |         | CACNA1S  |         |          |     |    |
|         |         | CACNA1H  | N | PDE1B    |   |         | CACNA2D1 |         |          |     |    |
|         |         | CACNA1S  | N | TNNC1    |   |         | CACNB2   |         |          |     |    |
|         |         | CACNA2D1 | N | TNNC2    |   |         | NR3C2    |         |          |     |    |
|         |         | CACNB2   | N |          |   |         |          |         |          |     |    |
|         |         | NR3C2    | N |          |   |         |          |         |          |     |    |
| DCU0126 | DB00584 | ACE      | N |          | 0 | DB00584 | ACE      |         | 0        | yes |    |
|         | DB00999 | CA1      | N |          |   | DB00999 | CA1      |         |          |     |    |
|         |         | CA12     | N |          |   |         | CA12     |         |          |     |    |
|         |         | CA2      | N |          |   |         | CA2      |         |          |     |    |
|         |         | CA4      | N |          |   |         | CA4      |         |          |     |    |
|         |         | CA9      | N |          |   |         | CA9      |         |          |     |    |
|         |         | KCNMA1   | U |          |   |         | KCNMA1   |         |          |     |    |
|         |         | SLC12A3  | N |          |   |         | SLC12A3  |         |          |     |    |
| DCU0127 | DB00876 | AGTR1    | N |          | 0 | DB00876 | AGTR1    |         | 0        | yes |    |
|         | DB00999 | CA1      | N |          |   | DB00999 | CA1      |         |          |     |    |
|         |         | CA12     | N |          |   |         | CA12     |         |          |     |    |
|         |         | CA2      | N |          |   |         | CA2      |         |          |     |    |
|         |         | CA4      | N |          |   |         | CA4      |         |          |     |    |
|         |         | CA9      | N |          |   |         | CA9      |         |          |     |    |
|         |         | KCNMA1   | U |          |   |         | KCNMA1   |         |          |     |    |
|         |         | SLC12A3  | N |          |   |         | SLC12A3  |         |          |     |    |
| DCU0128 | DB00796 | AGTR1    | N |          | 0 | DB00796 | AGTR1    |         | 0        | yes |    |
|         | DB00999 | CA1      | N |          |   | DB00999 | CA1      |         |          |     |    |
|         |         | CA12     | N |          |   |         | CA12     |         |          |     |    |
|         |         | CA2      | N |          |   |         | CA2      |         |          |     |    |
|         |         | CA4      | N |          |   |         | CA4      |         |          |     |    |
|         |         | CA9      | N |          |   |         | CA9      |         |          |     |    |
|         |         | KCNMA1   | U |          |   |         | KCNMA1   |         |          |     |    |
|         |         | SLC12A3  | N |          |   |         | SLC12A3  |         |          |     |    |
| DCU0129 | DB00999 | ACE      | N |          | 0 | DB00999 | ACE      |         | 0        | yes |    |
|         | DB01197 | CA1      | N |          |   | DB01197 | CA1      |         |          |     |    |
|         |         | CA12     | N |          |   |         | CA12     |         |          |     |    |
|         |         | CA2      | N |          |   |         | CA2      |         |          |     |    |
|         |         | CA4      | N |          |   |         | CA4      |         |          |     |    |
|         |         | CA9      | N |          |   |         | CA9      |         |          |     |    |
|         |         | KCNMA1   | U |          |   |         | KCNMA1   |         |          |     |    |
|         |         | MMP2     | N |          |   |         | MMP2     |         |          |     |    |
|         |         | SLC12A3  | N |          |   |         | SLC12A3  |         |          |     |    |
| DCU0130 | DB00310 | ADRB1    | N |          | 0 | DB00310 | ADRB1    |         | 0        | yes |    |
|         | DB00335 | SLC12A1  | N |          |   | DB00335 | SLC12A1  |         |          |     |    |
| DCU0131 | DB00612 | ADRB1    | N |          | 0 | DB00612 | ADRB1    |         | 0        | yes |    |
|         | DB00999 | ADRB2    | N |          |   | DB00999 | ADRB2    |         |          |     |    |
|         |         | CA1      | N |          |   |         | CA1      |         |          |     |    |
|         |         | CA12     | N |          |   |         | CA12     |         |          |     |    |
|         |         | CA2      | N |          |   |         | CA2      |         |          |     |    |
|         |         | CA4      | N |          |   |         | CA4      |         |          |     |    |
|         |         | CA9      | N |          |   |         | CA9      |         |          |     |    |
|         |         | KCNMA1   | U |          |   |         | KCNMA1   |         |          |     |    |
|         |         | SLC12A3  | N |          |   |         | SLC12A3  |         |          |     |    |
| DCU0134 | DB00373 | ADRB1    | N |          | 0 | DB00373 | ADRB1    |         | 0        | yes |    |
|         | DB00869 | ADRB2    | N |          |   | DB00869 | ADRB2    |         |          |     |    |
|         |         | CA1      | N |          |   |         | CA1      |         |          |     |    |

|         |                               |                                                                                                                                                                                                                    |                                                                                                                           |                |   |  |                               |                                                                                                                                                                                                                    |                      |
|---------|-------------------------------|--------------------------------------------------------------------------------------------------------------------------------------------------------------------------------------------------------------------|---------------------------------------------------------------------------------------------------------------------------|----------------|---|--|-------------------------------|--------------------------------------------------------------------------------------------------------------------------------------------------------------------------------------------------------------------|----------------------|
|         |                               | CA2<br>CA4                                                                                                                                                                                                         | N<br>N                                                                                                                    |                |   |  | CA2<br>CA4                    |                                                                                                                                                                                                                    |                      |
| DCU0151 | DB00331<br>DB01132            | PPARG<br>PRKAB1                                                                                                                                                                                                    | P<br>P                                                                                                                    |                | 0 |  | DB00331<br>DB01132            | PPARG<br>PRKAB1                                                                                                                                                                                                    | 0 yes                |
| DCU0152 | DB00331<br>DB00912            | ABCC8<br>PPARG<br>PRKAB1                                                                                                                                                                                           | N<br>P<br>P                                                                                                               |                | 0 |  | DB00331<br>DB00912            | ABCC8<br>PPARG<br>PRKAB1                                                                                                                                                                                           | 0 yes                |
| DCU0153 | DB00331<br>DB00412            | ACSL4<br>PPARG<br>PRKAB1                                                                                                                                                                                           | N<br>P<br>P                                                                                                               |                | 0 |  | DB00331<br>DB00412            | ACSL4<br>PPARG<br>PRKAB1                                                                                                                                                                                           | 0 yes                |
| DCU0154 | DB00331<br>DB01261            | DPP4<br>PRKAB1                                                                                                                                                                                                     | N<br>P                                                                                                                    |                | 0 |  | DB00331<br>DB01261            | DPP4<br>PRKAB1                                                                                                                                                                                                     | 0 yes                |
| DCU0155 | DB00222<br>DB01132            | ABCC8<br>KCNJ1<br>KCNJ11<br>PPARG                                                                                                                                                                                  | P<br>N<br>N<br>P                                                                                                          |                | 0 |  | DB00222<br>DB01132            | ABCC8<br>KCNJ1<br>KCNJ11<br>PPARG                                                                                                                                                                                  | 0 yes                |
| DCU0156 | DB00222<br>DB00412            | ABCC8<br>ACSL4<br>KCNJ1<br>KCNJ11<br>PPARG                                                                                                                                                                         | P<br>N<br>N<br>N<br>P                                                                                                     |                | 0 |  | DB00222<br>DB00412            | ABCC8<br>ACSL4<br>KCNJ1<br>KCNJ11<br>PPARG                                                                                                                                                                         | 0 yes                |
| DCU0157 | DB00331<br>DB01067            | ABCC8<br>PPARG<br>PRKAB1                                                                                                                                                                                           | N<br>P<br>P                                                                                                               |                | 0 |  | DB00331<br>DB01067            | ABCC8<br>PPARG<br>PRKAB1                                                                                                                                                                                           | 0 yes                |
| DCU0158 | DB00331<br>DB01016            | ABCA1<br>ABCB11<br>ABCC8<br>ABCC9<br>CFTR<br>KCNJ1<br>KCNJ11<br>KCNJ5<br>PRKAB1                                                                                                                                    | N<br>N<br>U<br>U<br>N<br>N<br>U<br>N<br>P                                                                                 |                | 0 |  | DB00331<br>DB01016            | ABCA1<br>ABCB11<br>ABCC8<br>ABCC9<br>CFTR<br>KCNJ1<br>KCNJ11<br>KCNJ5<br>PRKAB1                                                                                                                                    | 0 yes                |
| DCU0490 | DB00316<br>DB00318<br>DB00945 | OPRD1<br>OPRK1<br>OPRM1<br>PTGS1<br>PTGS2                                                                                                                                                                          | P<br>P<br>P<br>N<br>N                                                                                                     | AKR1C1         | 1 |  | DB00316<br>DB00318<br>DB00580 | OPRD1<br>OPRK1<br>OPRM1<br>PTGS1<br>PTGS2                                                                                                                                                                          | 0 partly yes         |
| DCU0491 | DB00316<br>DB00318<br>DB00945 | OPRD1<br>OPRK1<br>OPRM1<br>PTGS1<br>PTGS2                                                                                                                                                                          | P<br>P<br>P<br>N<br>N                                                                                                     | AKR1C1         | 1 |  | DB00316<br>DB00318<br>DB00580 | OPRD1<br>OPRK1<br>OPRM1<br>PTGS1<br>PTGS2                                                                                                                                                                          | 0 partly yes         |
| DCU0492 | DB00190<br>DB01235            | DDC<br>DRD1<br>DRD2<br>DRD3<br>DRD4<br>DRD5                                                                                                                                                                        | N<br>P<br>P<br>P<br>P<br>P                                                                                                |                | 0 |  | DB00190<br>DB01235            | DDC<br>DRD1<br>DRD2<br>DRD3<br>DRD4<br>DRD5                                                                                                                                                                        | 0 yes                |
| DCU0493 | DB00334<br>DB00472            | ADRA1A<br>ADRA1B<br>ADRA2A<br>ADRA2C<br>CHRM1<br>CHRM2<br>CHRM3<br>CHRM4<br>CHRM5<br>DRD1<br>DRD2<br>DRD3<br>DRD4<br>DRD5<br>HTR1A<br>HTR1B<br>HTR1D<br>HTR1E<br>HTR2A<br>HTR2C<br>HTR3A<br>HTR6<br>HTR7<br>SLC6A4 | N<br>N<br>N<br>N<br>N<br>N<br>N<br>N<br>N<br>N<br>N<br>N<br>N<br>N<br>N<br>N<br>N<br>N<br>N<br>N<br>N<br>N<br>N<br>N<br>N | ADRA2B<br>HRH1 | 2 |  | DB00334<br>DB00472            | ADRA1A<br>ADRA1B<br>ADRA2A<br>ADRA2C<br>CHRM1<br>CHRM2<br>CHRM3<br>CHRM4<br>CHRM5<br>DRD1<br>DRD2<br>DRD3<br>DRD4<br>DRD5<br>HTR1A<br>HTR1B<br>HTR1D<br>HTR1E<br>HTR2A<br>HTR2C<br>HTR3A<br>HTR6<br>HTR7<br>SLC6A4 | ADRA2B<br>HRH1 2 yes |
| DCU0494 | DB00542<br>DB00999            | ACE<br>CA1<br>CA12<br>CA2<br>CA4<br>CA9<br>KCNMA1<br>SLC12A3                                                                                                                                                       | N<br>N<br>N<br>N<br>N<br>N<br>U<br>N                                                                                      |                | 0 |  | DB00542<br>DB00999            | ACE<br>CA1<br>CA12<br>CA2<br>CA4<br>CA9<br>KCNMA1<br>SLC12A3                                                                                                                                                       | 0 yes                |
| DCU0495 | DB00999<br>DB01197            | ACE<br>CA1<br>CA12<br>CA2<br>CA4<br>CA9<br>KCNMA1<br>MMP2<br>SLC12A3                                                                                                                                               | N<br>N<br>N<br>N<br>N<br>N<br>U<br>N<br>N                                                                                 |                | 0 |  | DB00999<br>DB01197            | ACE<br>CA1<br>CA12<br>CA2<br>CA4<br>CA9<br>KCNMA1<br>MMP2<br>SLC12A3                                                                                                                                               | 0 yes                |

## Simulation Result on MOTSC

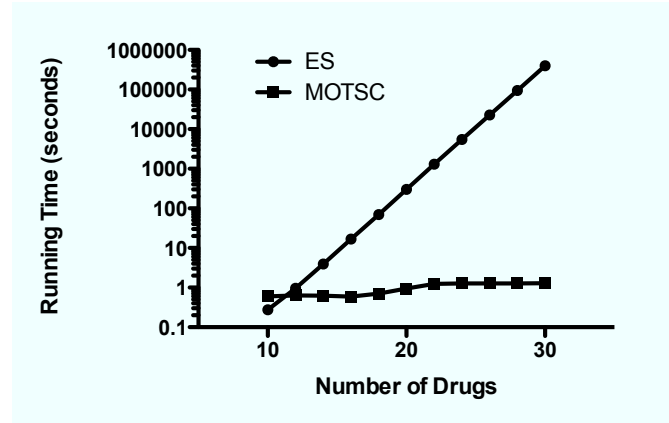

Supplementary Figure 1: Running time difference between MOTSC and ES. The number of associated drugs is simulated from 10 to 30 with a step size equal to 2. Each data point represents the average running time of 10 replicates. For the simulated data with 30 available drugs, ES takes about 4.6 days, while MOTSC only needs 2 seconds.



# BTSC Result on T2DM

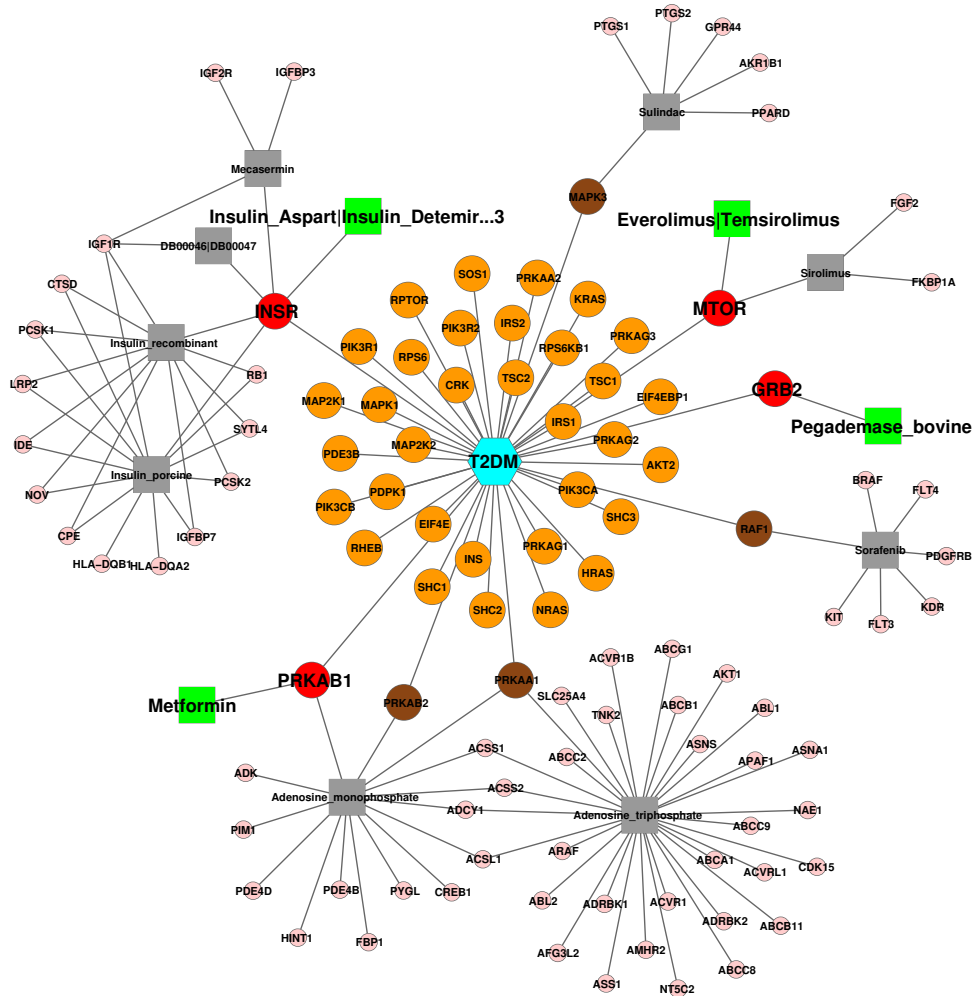

Supplementary Figure 2: The disease-gene-drug network of T2DM. The disease gene set name T2DM is represented using a cyan hexagon and there are 41 genes (red, orange or chocolate circles) in T2DM gene set. Four (green squares) of 13 associated drugs (green or gray squares) selected by BTSC can cover 4 T2DM genes (red circles) with no known off-target. Thirty three genes (orange circles) have no associated drugs and 4 genes (chocolate circles) associated with drugs are not covered by the selected drug combination.

# BTSC Result on PD

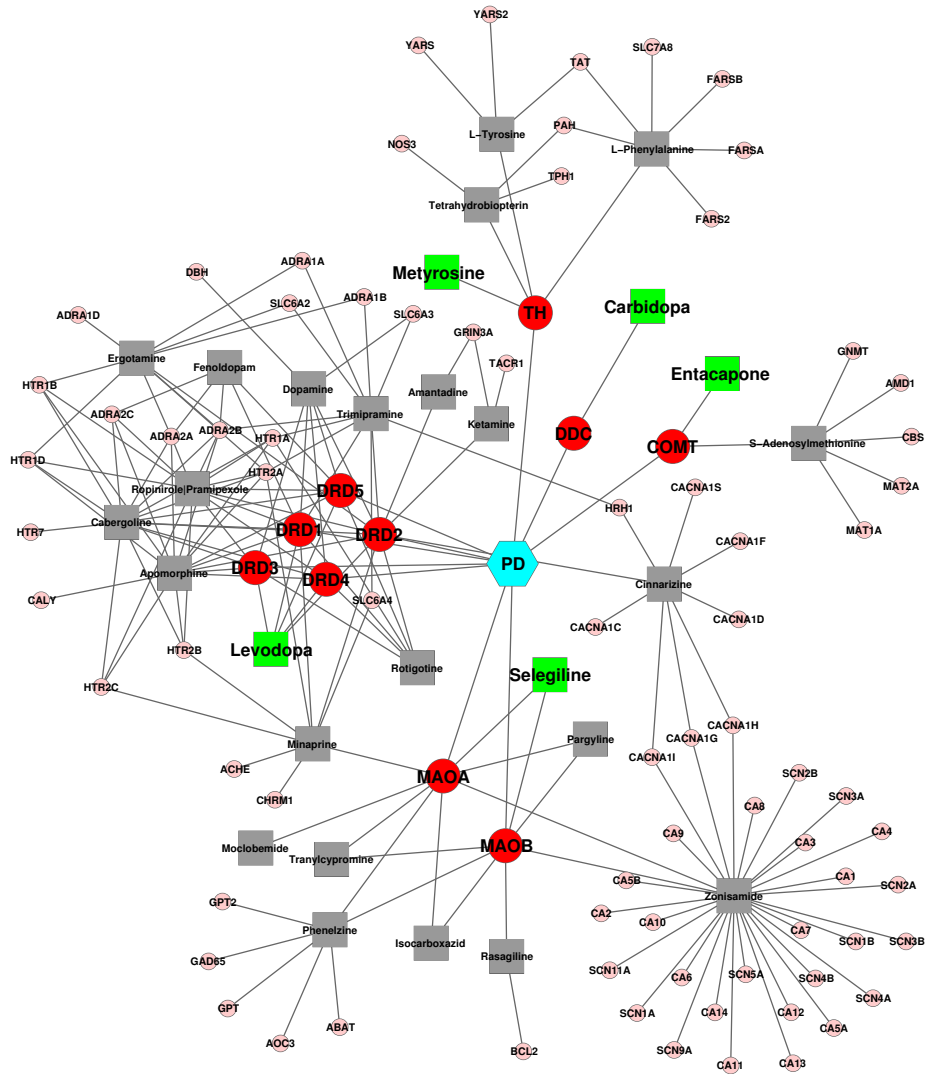

Supplementary Figure 3: The disease-gene-drug network of PD. The disease gene set name PD is represented using a cyan hexagon and there are 10 genes (red, orange or chocolate circles) in PD gene set. Five (green squares) of 28 associated drugs (green or gray squares) selected by BTSC can fully cover 10 PD genes (red circles) with no known off-target.

# BTSC Result on SZ

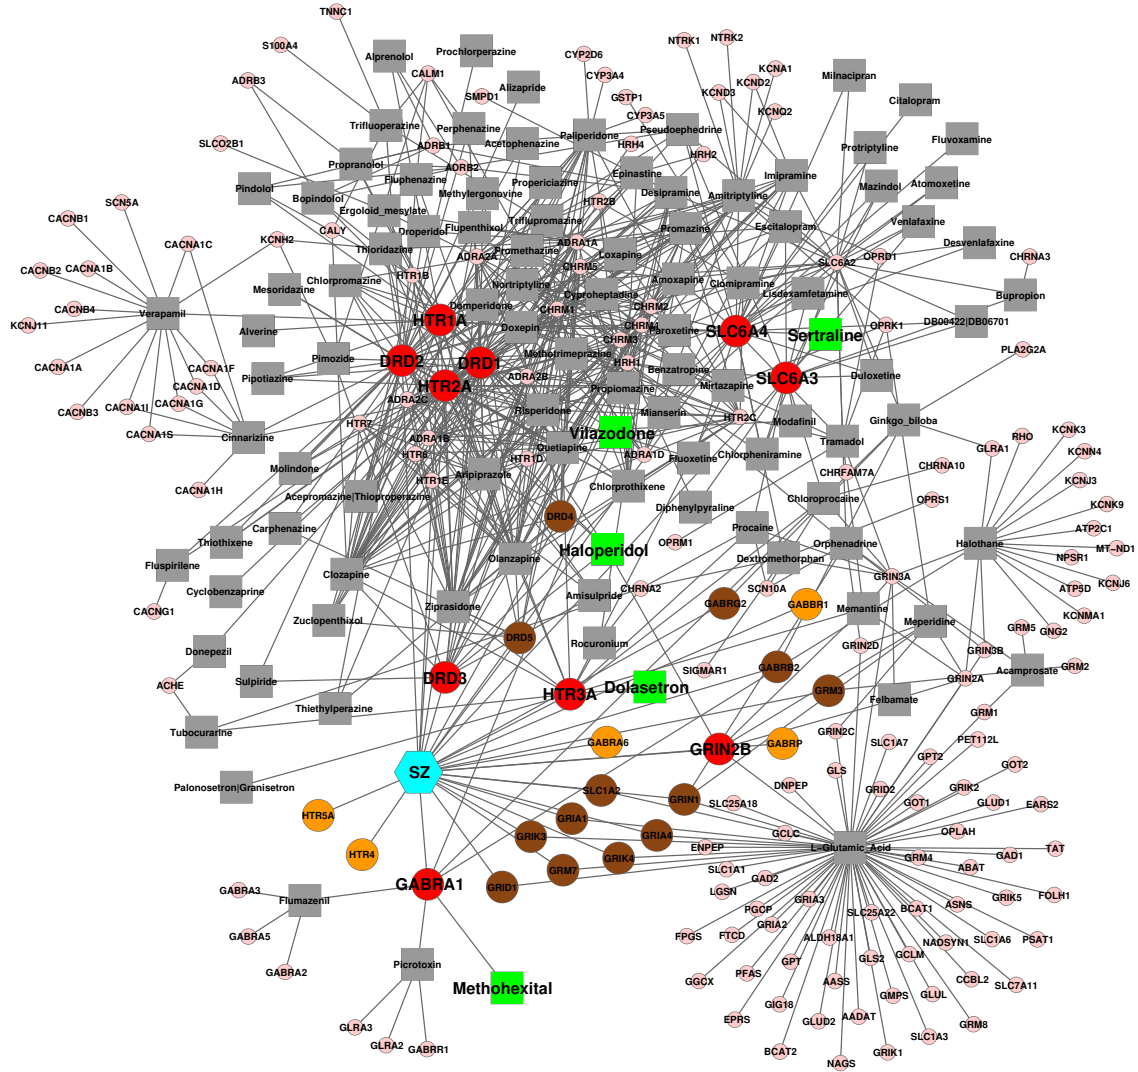

Supplementary Figure 4: The disease-gene-drug network of SZ. The disease gene set name SZ is represented using a cyan hexagon and there are 28 genes (red, orange or chocolate circles) in SZ gene set. Five (green squares) of 102 associated drugs (green or gray squares) selected by BTSC can cover 10 SZ genes (red circles) with no known off-target. Five genes (orange circles) have no associated drugs and 13 genes (chocolate circles) associated with drugs are not covered by the selected drug combination.



# MOTSC Result on EPAM

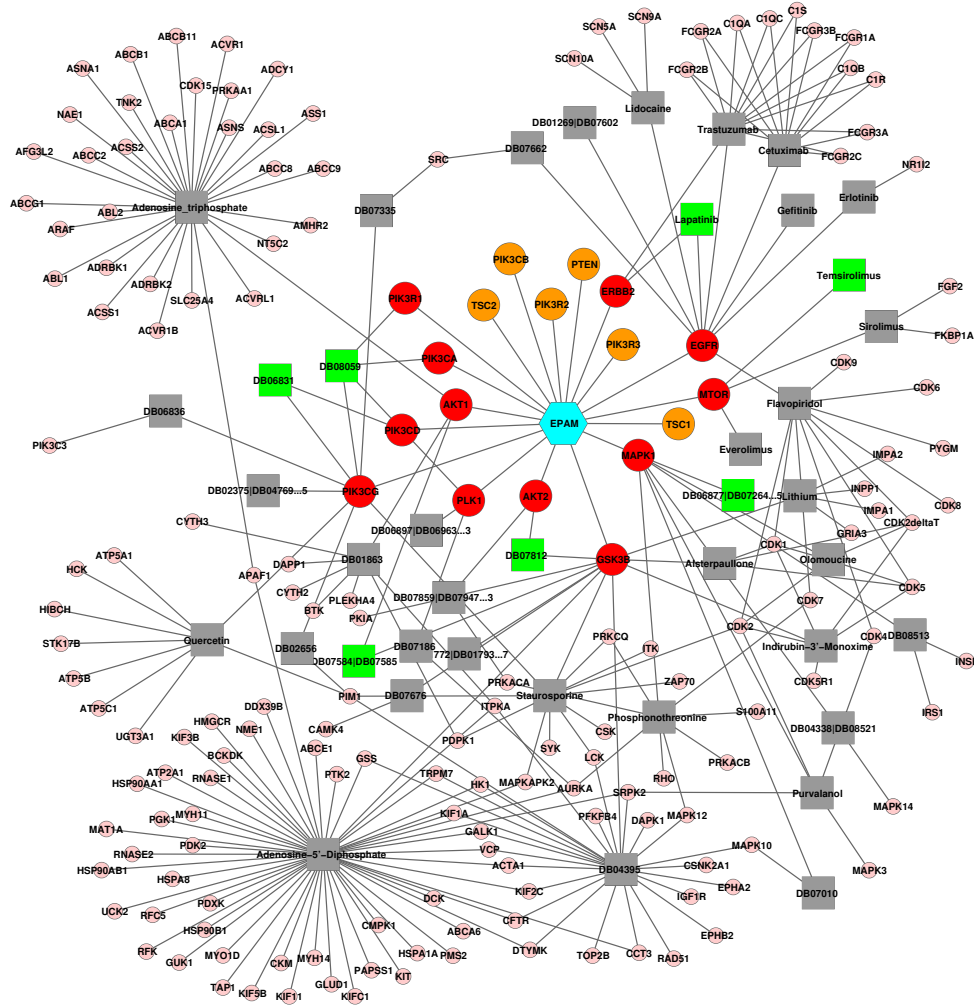

Supplementary Figure 6: The disease-gene-drug network of EPAM. High similarity was observed between the BTSC and MOTSC results. The different selection of drugs is primarily due to the full coverage requirement. Lapatinib, DB08059, DB06831, and DB07812 predicted by BTSC are still in MOTSC result. Several new drugs were selected, including Temsirolimus, DB07584|DB07585, and DB06877|DB07264...5. Among these new drugs, Temsirolimus is an inhibitor of mTOR, and DB07584|DB07585 (pyrrolopyrimidine) is an inhibitor of AKT1 and GSK3 $\beta$ . The drug combination identified by BTSC or MOTSC will offer the hope to better inhibit the whole EPAM pathway.

# MOTSC Result on HTN

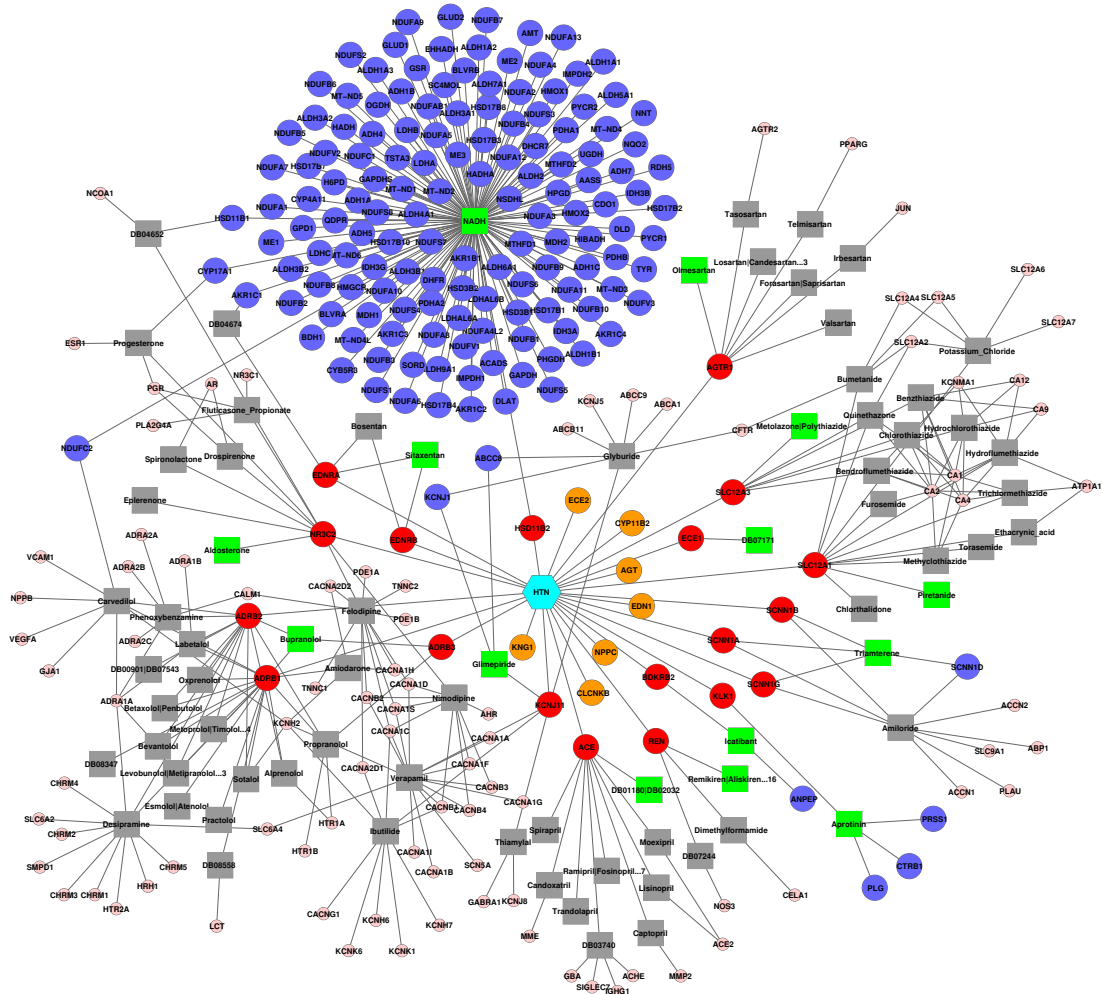

Supplementary Figure 7: The disease-gene-drug network of HTN. Triamterene, Bupranolol, Remikiren, and Sitaxentan predicted by BTSC are still in MOTSC result. Among the new drugs selected, Olmesartan, Metolazone, and Polythiazide are known drugs for the treatment of HTN. A combination tablet containing Metolazone and Triamterene, new drug combination predicted by MOTSC, is reported to be useful in the treatment of HTN (Patent US 4522818 A). The full coverage requirement introduced several more drugs and the selection of NADH, which induced a large number of off-targets. This result demonstrated that BTSC is more flexible and balanced when dealing with real disease gene sets.

# MOTSC Result on T2DM

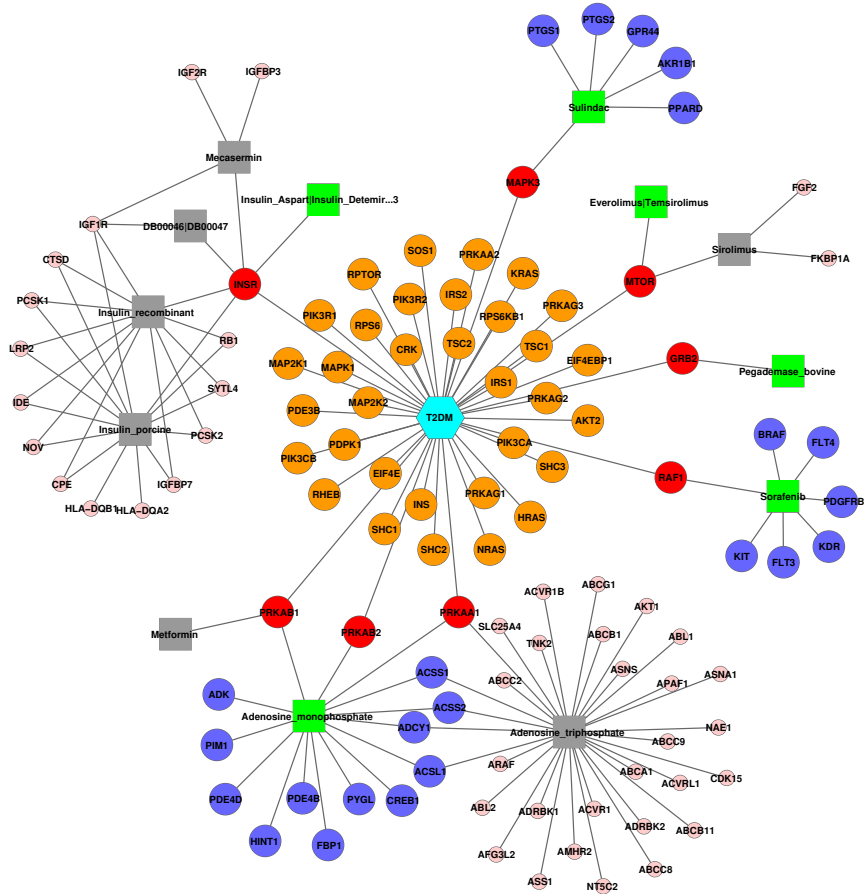

Supplementary Figure 8: The disease-gene-drug network of T2DM. Similar result was obtained when MOTSC algorithm was applied to the same T2DM gene set. Insulin Aspart|Insulin Detemir, Everolimus|Tensirolimus, and Pegademase predicted by BTSC are still in MOTSC result. Several new drugs were selected because of full coverage required by MOTSC. Among the new drugs, Adenosine monophosphate is used for nutritional supplementation and for treating dietary shortage or imbalance. Similar to Metformin, this drug can activate PRKAB1 as well. The use of this drug for treating T2DM is worth further studying.



# MOTSC Result on SZ

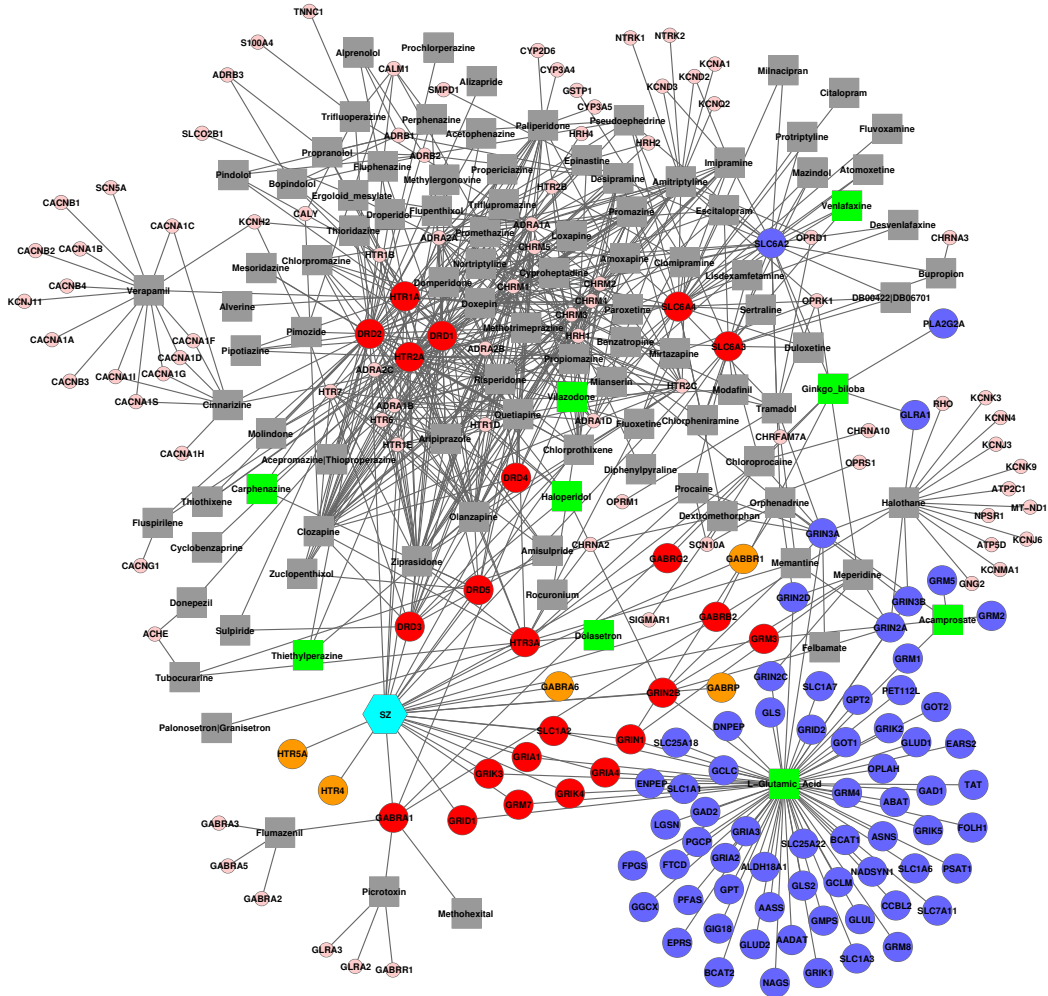

Supplementary Figure 9: The disease-gene-drug network of SZ. Haloperidol, Dolasetron, and Vilazodone predicted by BTSC are still in MOTSC result. Among the new drugs selected, Carphenazine, and Thiethylperazine are known drugs to treat SZ, while Ginkgo biloba and L-Glutamic Acid can benefit SZ treatment. Haloperidol plus extract of Ginkgo biloba, new drug combination predicted by MOTSC, can improve the treatment of patients with SZ (Zhang *et al.*, 2001, 2006). Similar to HTN, large number of off-targets were induced due to the requirement of full coverage. Application of MOTSC on the five disease gene sets indicates that MOTSC is more applicable if the user has specific requirement that all the input genes must be targeted if there are drugs available. Thus, BTSC and MOTSC provided two complementary ways to identify optimal drug combination.



## References

- Hamosh, A., Scott, A. F., Amberger, J. S., Bocchini, C. A., and McKusick, V. A. (2005). Online Mendelian Inheritance in Man (OMIM), a knowledgebase of human genes and genetic disorders. *Nucleic acids research*, **33**(Database issue), D514–7.
- Wall, D. P., Pivovarov, R., Tong, M., Jung, J.-Y., Fusaro, V. A., DeLuca, T. F., and Tonellato, P. J. (2010). Genotator: a disease-agnostic tool for genetic annotation of disease. *BMC medical genomics*, **3**, 50.
- Zhang, X. Y., Zhou, D. F., Su, J. M., and Zhang, P. Y. (2001). The effect of extract of ginkgo biloba added to haloperidol on superoxide dismutase in inpatients with chronic schizophrenia. *Journal of clinical psychopharmacology*, **21**(1), 85–88.
- Zhang, X. Y., Zhou, D. F., Cao, L. Y., and Wu, G. Y. (2006). The effects of Ginkgo biloba extract added to haloperidol on peripheral T cell subsets in drug-free schizophrenia: a double-blind, placebo-controlled trial. *Psychopharmacology*, **188**(1), 12–17.
